# Supplementary material for: Solvothermal synthesis of Sn3N4 as a high capacity sodium-ion anode: theoretical and experimental study of its storage mechanism
Source: Royal Society of Chemistry journal article supplement (doi:10.1039/d0ta04034g), 2020-01-01
Supplement: d0ta04034g1.pdf [file d0ta04034g1.pdf]

## Electronic Supplementary Information:

### Solvothermal Synthesis of $\text{Sn}_3\text{N}_4$ as a High Capacity Sodium-Ion Anode: Theoretical and Experimental Study of its Storage Mechanism

Samuel D. S. Fitch,<sup>a</sup> Giannantonio Cibin,<sup>b</sup> Steven P. Hepplestone,<sup>c</sup> Nuria Garcia-Araez<sup>a</sup> and Andrew L. Hector<sup>a</sup>

<sup>a</sup> School of Chemistry, University of Southampton, Southampton SO17 1BJ, UK

<sup>b</sup> Diamond Light Source Ltd, Diamond House, Harwell Science and Innovation Campus, Didcot, Oxfordshire OX11 0DE, UK

<sup>c</sup> School of Physics and Astronomy, University of Exeter, Stocker Road, Exeter, EX4 4QL UK

#### Contents

**Fig. S1** *Ex situ* diffraction patterns of microcrystalline  $\text{Sn}_3\text{N}_4$  electrodes during the initial sodiation reaction in Na half-cells. The electrodes have been prepared without homogenising the ink. Dashed red lines indicate Sn reflections observed at lower potentials during the initial reduction.

**Fig. S2** Rietveld fits for microcrystalline  $\text{Sn}_3\text{N}_4$  (**top**, one phase) and nanocrystalline  $\text{Sn}_3\text{N}_4$  (**bottom**, two phases). (+) Indicate collected data points. Upper continuous line is the calculated profile and lower continuous line is the difference. Tick marks show allowed reflection positions for  $\text{Sn}_3\text{N}_4$ .

**Table S1** Fitted parameters from the Rietveld fit to the XRD patterns for nanocrystalline and microcrystalline  $\text{Sn}_3\text{N}_4$ .

**Table S2** Results of the EXAFS fit for nanocrystalline  $\text{Sn}_3\text{N}_4$  and microcrystalline  $\text{Sn}_3\text{N}_4$ .

**Table S3** The formation energy,  $E_f$ , of various reactions of Na insertion and substitution in bulk  $\text{Sn}_3\text{N}_4$  using PBE functional.

**Table S4** The formation energy,  $E_f$ , of various reactions of Na insertion and substitution on the surface of  $\text{Sn}_3\text{N}_4$  using PBE functional.

**Fig. S3** A ball and stick representation of the  $\text{Sn}_3\text{N}_4$  surface structure. The large purple spheres are Sn; the smaller purple spheres are nitrogen. The Na interstitials are shown with green dots. The two substitutional sites for the substitution of Sn by Na are highlighted with orange dots.

**Fig. S4** Derivative capacity plot computed from the initial galvanostatic cycle of microcrystalline (**Left**) and nanocrystalline (**Right**)  $\text{Sn}_3\text{N}_4$  at a specific current of 50 mA g<sup>-1</sup>.

**Fig. S5 (a)** Sn-K edge XANES of known Sn standards and pristine microcrystalline  $\text{Sn}_3\text{N}_4$  electrode. **(b)** Calibration of Sn-K edge energies vs. oxidation state.

**Table S5** Average oxidation state, as evaluated from the Sn K-edge energies, of microcrystalline  $\text{Sn}_3\text{N}_4$  electrodes as a function of cell potential during reduction and oxidation.

**Fig. S6** Comparison of the XRD of the pristine microcrystalline  $\text{Sn}_3\text{N}_4$  electrode and the ICSD database pattern of  $\text{CrO}_2$  and NiO.

**Fig. S7** Comparison of the XRD of the microcrystalline  $\text{Sn}_3\text{N}_4$  electrode as a function of cell potential and the ICSD database pattern of  $\text{Sn}_3\text{N}_4$ , Sn and  $\text{SnO}_2$ .

**Fig. S8** Fourier transforms of  $K^3$ -weighted Sn K-edge EXAFS during initial and final states of the first reduction of microcrystalline  $\text{Sn}_3\text{N}_4$ . The data of  $\text{Na}_{15}\text{Sn}_4$  and  $\text{Na}_4\text{Sn}$  from the ICSD database is also included for comparison. Grey vertical lines indicate the radial distance of Sn-N bonds with Sn in tetrahedral or octahedral sites, and the pink vertical line indicate Na-Sn bond distance.

**Fig. S9** Ex-situ Raman spectrum of a microcrystalline  $\text{Sn}_3\text{N}_4$  electrode cycled to 10 mV in a Na half-cell. The spectrum does not show any characteristic bands that could be ascribed to  $\text{NaN}_3$  or  $\text{Na}_2\text{N}_2$  formation.

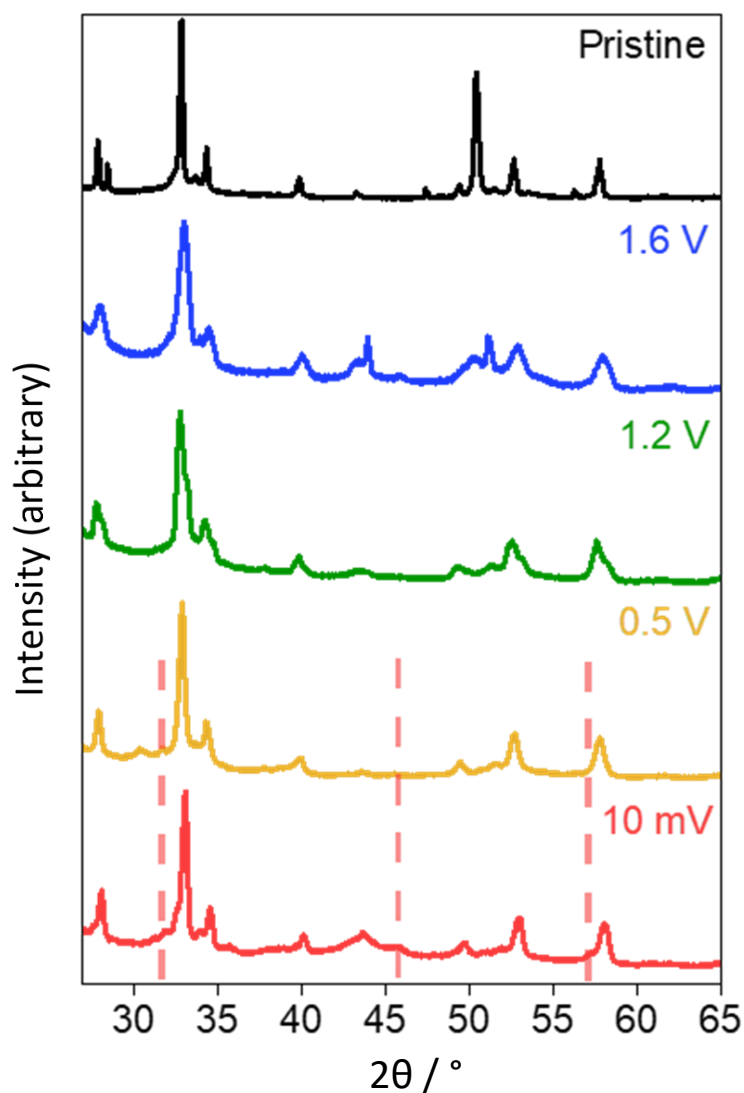

**Fig. S1** *Ex situ* diffraction patterns of microcrystalline  $\text{Sn}_3\text{N}_4$  electrodes during the initial sodiation reaction in Na half-cells. The electrodes have been prepared without homogenising the ink. Dashed red lines indicate Sn reflections observed at lower potentials during the initial reduction.

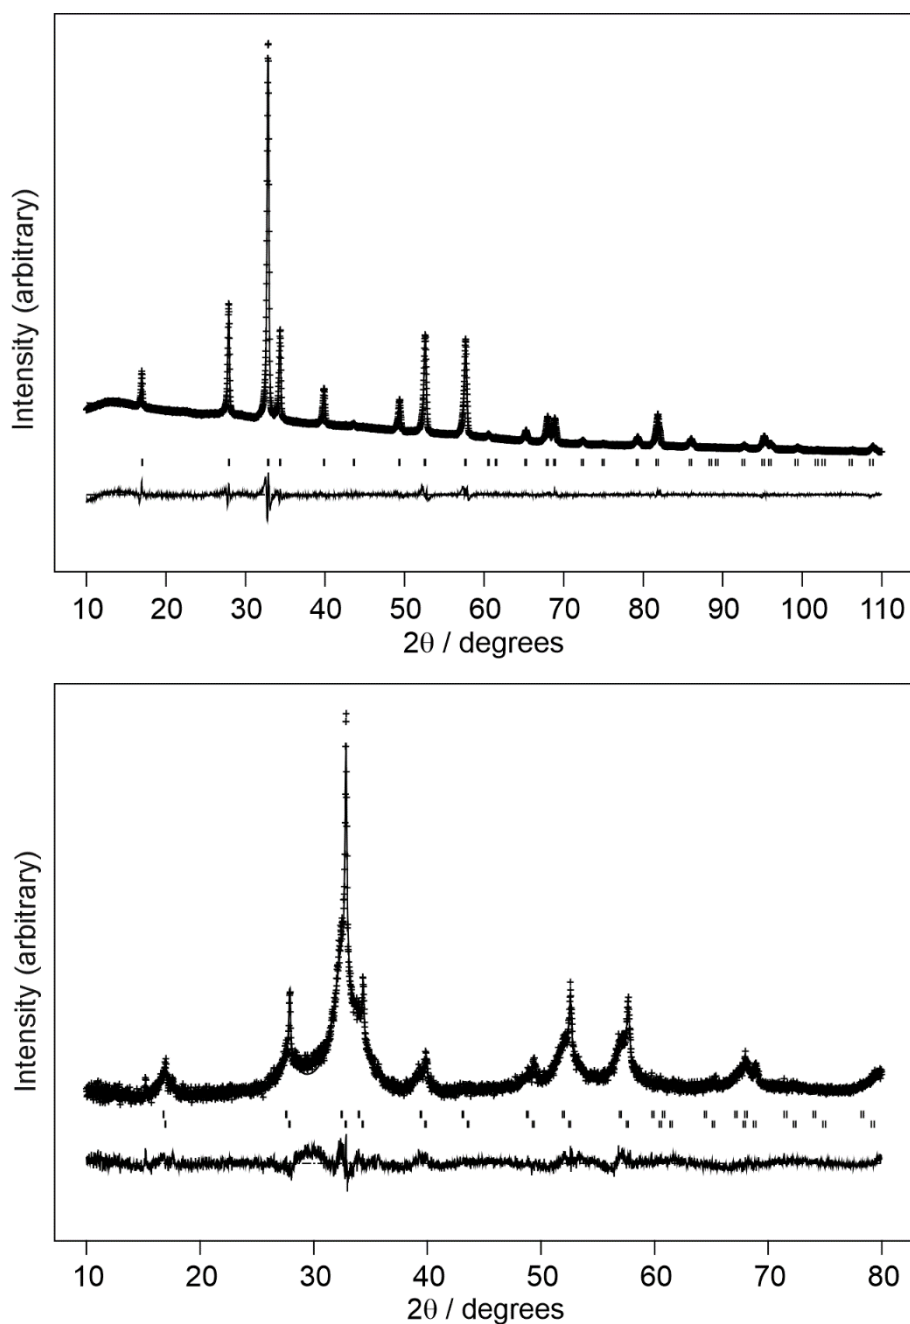

**Fig. S2** Rietveld fits for microcrystalline Sn<sub>3</sub>N<sub>4</sub> (**top**, one phase) and nanocrystalline Sn<sub>3</sub>N<sub>4</sub> (**bottom**, two phases). (+) Indicate collected data points. Upper continuous line is the calculated profile and lower continuous line is the difference. Tick marks show allowed reflection positions for Sn<sub>3</sub>N<sub>4</sub>.

**Table S1** Fitted parameters from the Rietveld fit to the XRD patterns for nanocrystalline and microcrystalline Sn<sub>3</sub>N<sub>4</sub>.

| Material                                              | “Microcrystalline”<br>Sn <sub>3</sub> N <sub>4</sub> | “Nanocrystalline” Sn <sub>3</sub> N <sub>4</sub> |                 |
|-------------------------------------------------------|------------------------------------------------------|--------------------------------------------------|-----------------|
|                                                       |                                                      | Minor component                                  | Major Component |
| R <sub>wp</sub> / %                                   | 5.0                                                  | 9.4                                              |                 |
| R <sub>p</sub> / %                                    | 3.4                                                  | 7.4                                              |                 |
| Wt %                                                  | 100                                                  | 13.2(4)                                          | 86.8(2)         |
| a / Å                                                 | 9.0549(2)                                            | 9.0514(4)                                        | 9.139(2)        |
| Crystallite size / nm                                 | 310(40)                                              | 137(13)                                          | 5.950(9)        |
| Sn1 (1/8, 1/8, 1/8) U <sub>iso</sub> / Å <sup>2</sup> | 0.0231(6)                                            | 0.0102(10)                                       | 0.0102(10)      |
| Sn2 (1/2, 1/2, 1/2) U <sub>iso</sub> / Å <sup>2</sup> | 0.0234(5)                                            | 0.0102(10)                                       | 0.0102(10)      |
| N (x,x,x) x-value                                     | 0.2600(6)                                            | 0.263(3)                                         | 0.261(2)        |
| N (x,x,x) U <sub>iso</sub> / Å <sup>2</sup>           | 0.008(2)                                             | 0.02                                             | 0.02            |

**Table S2** Results of the EXAFS fit for nanocrystalline Sn<sub>3</sub>N<sub>4</sub> and microcrystalline Sn<sub>3</sub>N<sub>4</sub>.

| Coordination             | Microcrystalline EXAFS data analysis |                 | Nanocrystalline EXAFS data analysis |                 | Model crystallographic data |
|--------------------------|--------------------------------------|-----------------|-------------------------------------|-----------------|-----------------------------|
|                          | R <sub>r</sub> / Å                   |                 | R <sub>r</sub> / Å                  |                 |                             |
| Sn(1)-N<br>(tetrahedral) | R <sub>r</sub> / Å                   | 2.028 ± 0.019   | R <sub>r</sub> / Å                  | 2.077 ± 0.039   | 2.105                       |
|                          | σ <sub>F</sub> <sup>2</sup> / Å      | 0.0030 ± 0.0021 | σ <sub>F</sub> <sup>2</sup> / Å     | 0.0043 ± 0.0029 | -                           |
| Sn(2)-N<br>(octahedral)  | R <sub>r</sub> / Å                   | 2.137 ± 0.015   | R <sub>r</sub> / Å                  | 2.182 ± 0.0234  | 2.177                       |
|                          | σ <sub>F</sub> <sup>2</sup> / Å      | 0.0070 ± 0.0029 | σ <sub>F</sub> <sup>2</sup> / Å     | 0.0070 ± 0.0055 | -                           |

**Table S3** The formation energy,  $E_f$ , of various reactions of Na insertion and substitution in bulk  $\text{Sn}_3\text{N}_4$  using PBE functional. The values of formation energies are given per Na atom.

| Atom/Defect type         | Site label | Coordinates                                                   | $E_f$ in eV<br>PBE<br>(HSE06) | Description                                                                                                                                                                                                                                                                                        |
|--------------------------|------------|---------------------------------------------------------------|-------------------------------|----------------------------------------------------------------------------------------------------------------------------------------------------------------------------------------------------------------------------------------------------------------------------------------------------|
| $\text{Sn}_{\text{tet}}$ | 8a         | $\frac{1}{8}, \frac{1}{8}, \frac{1}{8}$                       | -                             | Tetrahedral Sn sites                                                                                                                                                                                                                                                                               |
| $\text{Sn}_{\text{oct}}$ | 16d        | $\frac{1}{2}, \frac{1}{2}, \frac{1}{2}$                       | -                             | Octahedral Sn sites                                                                                                                                                                                                                                                                                |
| N                        | 32e        | $\frac{1}{4}, \frac{1}{4}, \frac{1}{4}$                       | -                             | N sites                                                                                                                                                                                                                                                                                            |
| Interstitial             | 48f        | $0.35, \frac{1}{8}, \frac{1}{8}$                              | 3.76<br>(3.37)                | Tetrahedral Na interstitial edge linking to one $\text{SnN}_6$ octahedron and one $\text{SnN}_4$ tetrahedron.                                                                                                                                                                                      |
| Interstitial             | 16c        | $\frac{1}{2}, 0, \frac{1}{2}$                                 | 1.68                          | Octahedral Na interstitial face linking to one $\text{SnN}_4$ tetrahedron and edge linking to two $\text{SnN}_6$ octahedra.                                                                                                                                                                        |
| Interstitial             | 32e        | $0.4, 0.1, 0.6$                                               | 3.76                          | Tetrahedral Na interstitial face linking to two $\text{SnN}_6$ octahedra and edge linking to one $\text{SnN}_4$ tetrahedron.                                                                                                                                                                       |
| Interstitial             | 48f        | $\frac{1}{8}, \frac{1}{8}, \frac{3}{8}$                       | 3.78                          | Tetrahedral Na interstitial face linking to two $\text{SnN}_6$ octahedra and edge linking to one $\text{SnN}_4$ tetrahedron.                                                                                                                                                                       |
| Interstitial             | 16c        | $\frac{1}{4}, 0, \frac{1}{4}$                                 | 2.36                          | Octahedral Na interstitial face linking to one $\text{SnN}_4$ tetrahedron and edge linking to two $\text{SnN}_6$ octahedra. Initial structure resulted in distortion of $\text{Sn}_3\text{N}_4$ lattice.                                                                                           |
| Interstitial             | 16c        | $\frac{1}{2}, \frac{1}{4}, \frac{3}{4}$                       | -0.53                         | Octahedral Na interstitial face linking to two $\text{SnN}_4$ tetrahedra edge linking to four $\text{SnN}_6$ octahedra. Unit cell doubled along a so the $\frac{1}{4}, \frac{1}{4}, \frac{3}{4}$ interstitial site becomes $\frac{1}{2}, \frac{1}{4}, \frac{3}{4}$ based on the standard unit cell |
| Substitution             | 16d        | $0, 0, 0$                                                     | 4.47                          | Substitution of Na into one octahedral Sn site.                                                                                                                                                                                                                                                    |
| Substitution             | 8a         | $\frac{1}{8}, \frac{1}{8}, \frac{1}{8}$                       | 4.33                          | Substitution of Na into one tetrahedral Sn site.                                                                                                                                                                                                                                                   |
| Substitution             | 32e        | $\frac{1}{4}, \frac{1}{4}, \frac{1}{4}$                       | 8.68                          | Substitution of Na into one N site.                                                                                                                                                                                                                                                                |
| Double interstitial      | 32e & 16c  | $0.4, 0.1, 0.6$ & $\frac{1}{2}, 0, \frac{1}{2}$               | 1.89                          | Octahedral Na interstitial face linking to one $\text{SnN}_4$ tetrahedron and edge linking to two $\text{SnN}_6$ octahedra. & Octahedral Na interstitial face linking to one $\text{SnN}_4$ tetrahedron and edge linking to two $\text{SnN}_6$ octahedra.                                          |
| Double interstitial      | 16c & 16c  | $\frac{1}{2}, 0, \frac{1}{2}$ & $\frac{1}{4}, 0, \frac{1}{4}$ | 1.28                          | Octahedral Na interstitial face linking to one $\text{SnN}_4$ tetrahedron and edge linking to two $\text{SnN}_6$ octahedra & Octahedral Na interstitial face linking to one $\text{SnN}_4$ tetrahedron and edge linking to two $\text{SnN}_6$ octahedra. Initial structure.                        |

**Table S4** The formation energy,  $E_f$ , of various reactions of Na insertion and substitution on the surface of  $\text{Sn}_3\text{N}_4$  using PBE functional. The slab modelled was 14 Å in thickness and consisted of a 1x1 surface reconstruction. The values of formation energies are given per Na atom.

| Atom/Defect type       | $E_f$<br>PBE<br>(eV) | Description                                                                          |
|------------------------|----------------------|--------------------------------------------------------------------------------------|
| Na adsorbent           | -3.58                | Na atom adsorbed to surface of $\text{Sn}_3\text{N}_4$ slab (above tetrahedral site) |
| Interstitial           | -3.36                | Na interstitial X $\sim 2\text{Å}$ below the surface                                 |
| Interstitial           | -1.74                | Na interstitial X $\sim 7\text{Å}$ below the surface                                 |
| Na substitution for Sn | -1.90                | Na substituted for surface tetrahedral Sn                                            |
| Na substitution for Sn | -0.59                | Na substituted for subsurface tetrahedral Sn (below surface monolayer)               |

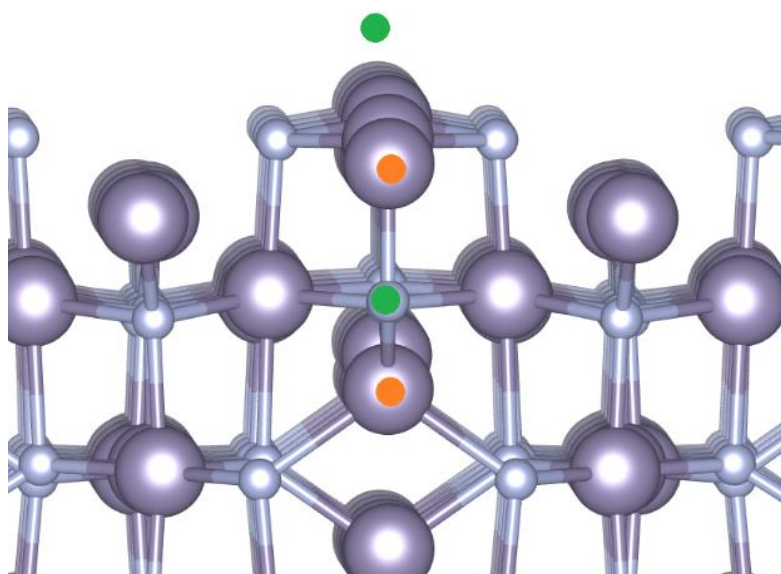

**Fig. S3.** A ball and stick representation of the  $\text{Sn}_3\text{N}_4$  surface structure. The large purple spheres are Sn; the smaller purple spheres are nitrogen. The Na interstitials are shown with green dots. The two substitutional sites for the substitution of Sn by Na are highlighted with orange dots.

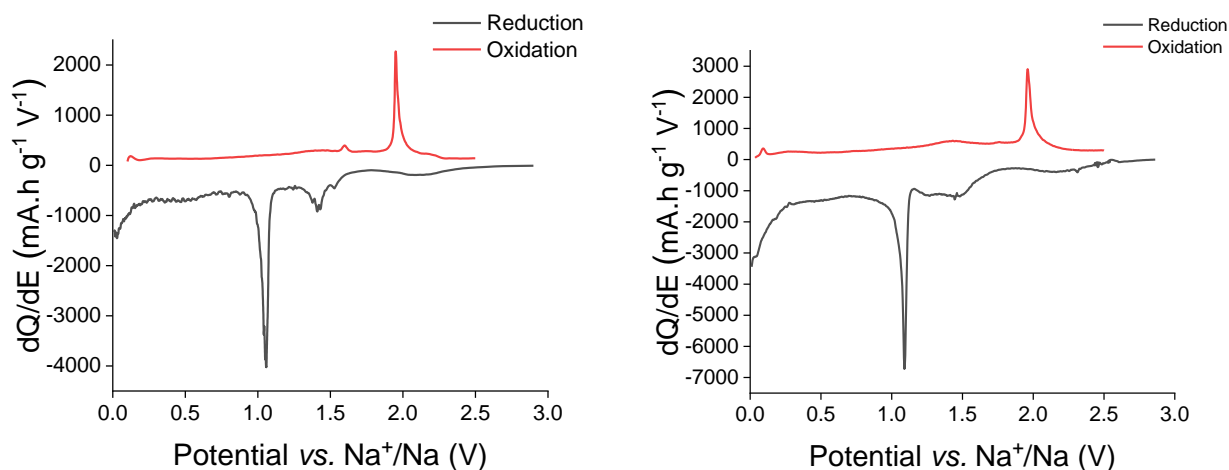

**Fig. S4** Derivative capacity plot computed from the initial galvanostatic cycle of microcrystalline (**Left**) and nanocrystalline (**Right**)  $\text{Sn}_3\text{N}_4$  at a specific current of  $50 \text{ mA g}^{-1}$ .

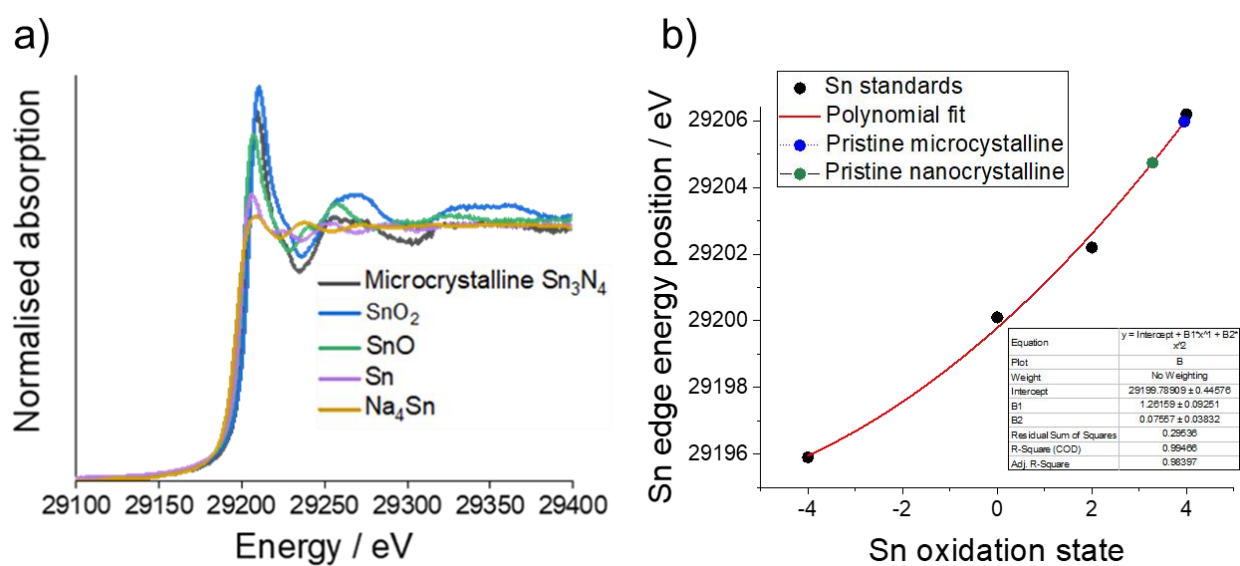

**Fig. S5 (a)** Sn-K edge XANES of known Sn standards and pristine microcrystalline  $\text{Sn}_3\text{N}_4$  electrode. **(b)** Calibration of Sn-K edge energies vs. oxidation state.

**Table S5** Average oxidation state, as evaluated from the Sn K-edge energies, of microcrystalline Sn<sub>3</sub>N<sub>4</sub> electrodes as a function of cell potential during reduction and oxidation.

| Sample vs. (Na <sup>+</sup> /Na) |        | Oxidation state (Sn) | Sn K-edge energy |
|----------------------------------|--------|----------------------|------------------|
| Pristine                         |        | 3.7                  | 29205.5          |
| reduction                        | 1.6 V  | 3.1                  | 29204.4          |
|                                  | 1.2 V  | 2.9                  | 29203.8          |
|                                  | 1.0 V  | 2.5                  | 29203.4          |
|                                  | 0.5 V  | 1.3                  | 29201.2          |
|                                  | 10 mV  | -0.1                 | 29199.6          |
| oxidation                        | 0.1 V  | 0.9                  | 29200.7          |
|                                  | 0.75 V | 1.5                  | 29301.3          |
|                                  | 1.5 V  | 2.8                  | 29203.9          |
|                                  | 2.5 V  | 3.5                  | 29205.2          |

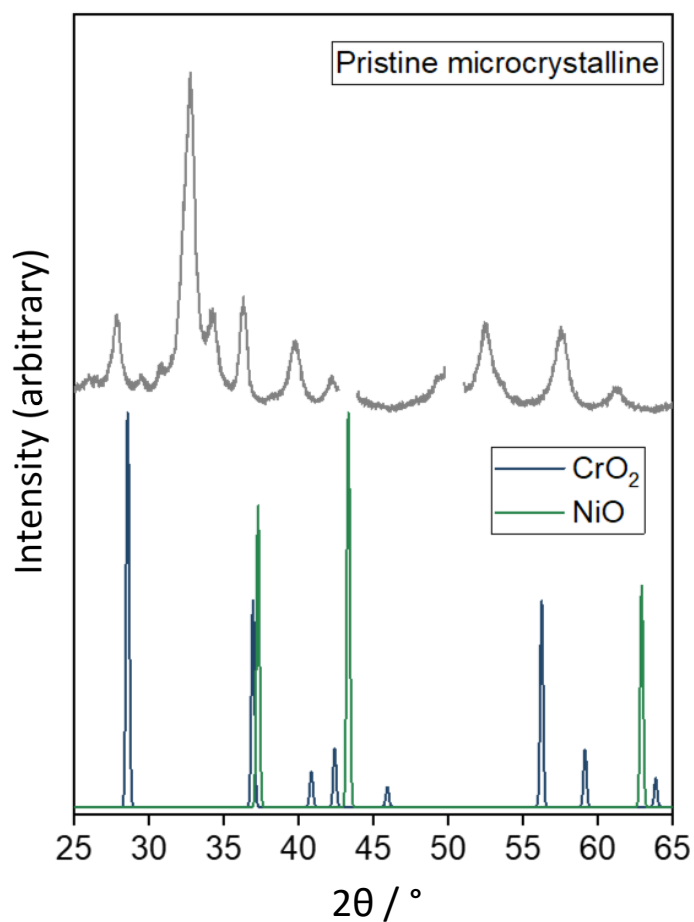

**Fig. S6** Comparison of the XRD of the pristine microcrystalline Sn<sub>3</sub>N<sub>4</sub> electrode and the ICSD database pattern of CrO<sub>2</sub> and NiO.



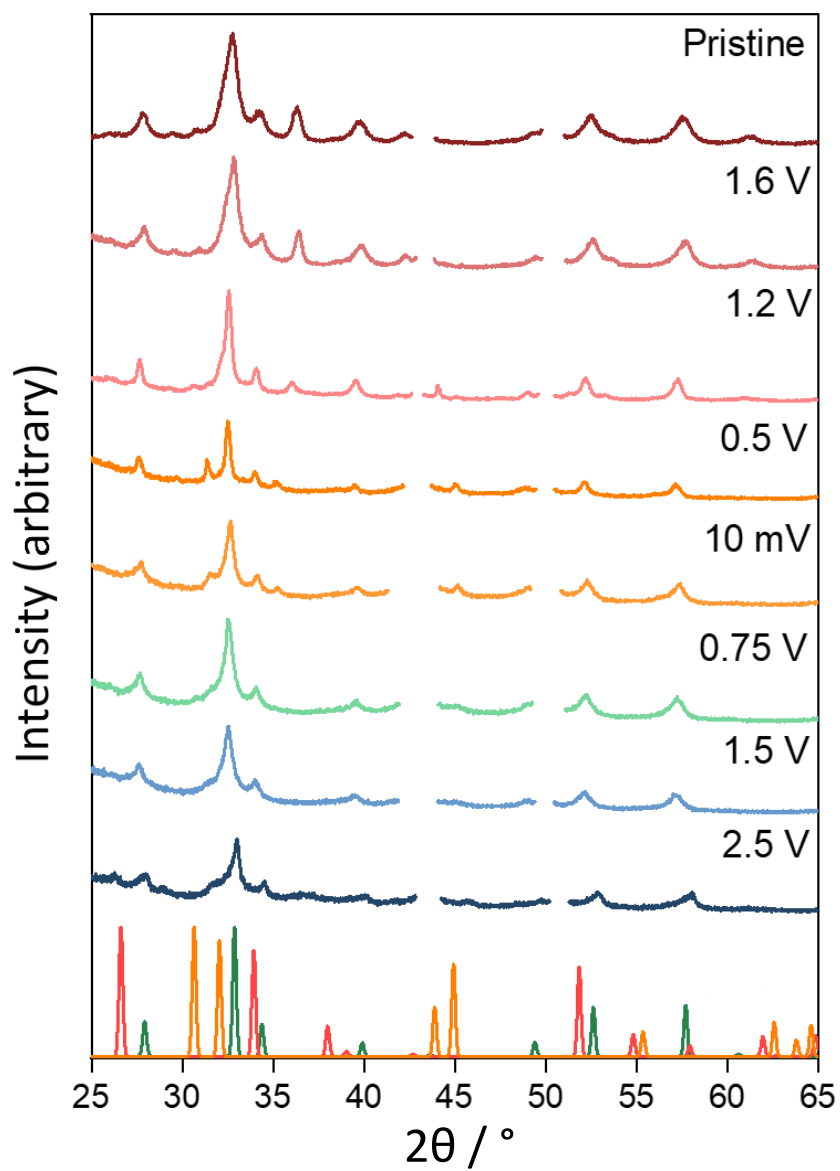

**Fig. S7** Comparison of the XRD of the microcrystalline  $\text{Sn}_3\text{N}_4$  electrode as a function of cell potential and the ICSD database pattern of  $\text{Sn}_3\text{N}_4$  (green) Sn (orange) and  $\text{SnO}_2$  (red).

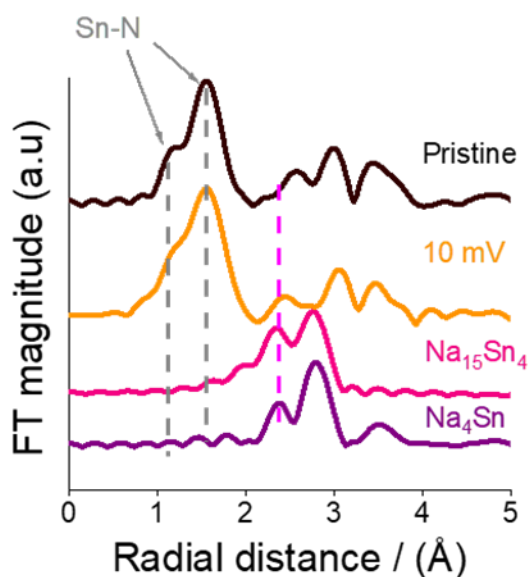

**Fig. S8** Fourier transforms of  $K^3$ -weighted Sn K-edge EXAFS during initial and final states of the first reduction of microcrystalline  $\text{Sn}_3\text{N}_4$ . The data of  $\text{Na}_{15}\text{Sn}_4$  and  $\text{Na}_4\text{Sn}$  from the ICSD database is also included for comparison. Grey vertical lines indicate the radial distance of Sn-N bonds with Sn in tetrahedral or octahedral sites, and the pink vertical line indicate Na-Sn bond distance.

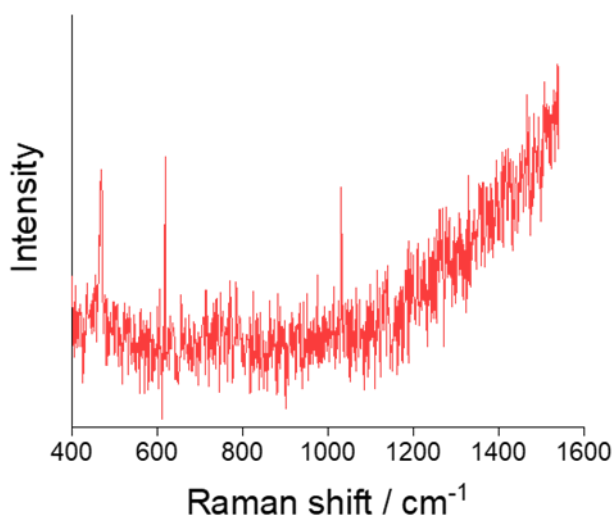

**Fig. S9** Ex-situ Raman spectrum of a microcrystalline  $\text{Sn}_3\text{N}_4$  electrode cycled to 10 mV in a Na half-cell. The spectrum does not show any characteristic bands that could be ascribed to  $\text{NaN}_3$  or  $\text{Na}_2\text{N}_2$  formation.
